# Supplementary material for: Isolation and Characterization of Flavonoid Naringenin and Evaluation of Cytotoxic and Biological Efficacy of Water Lilly (Nymphaea mexicana Zucc.)
Source: MDPI journal article supplement (doi:10.3390/plants11243588), 2022-12-19
Supplement: s1 [file s1]

## Supplementary Materials

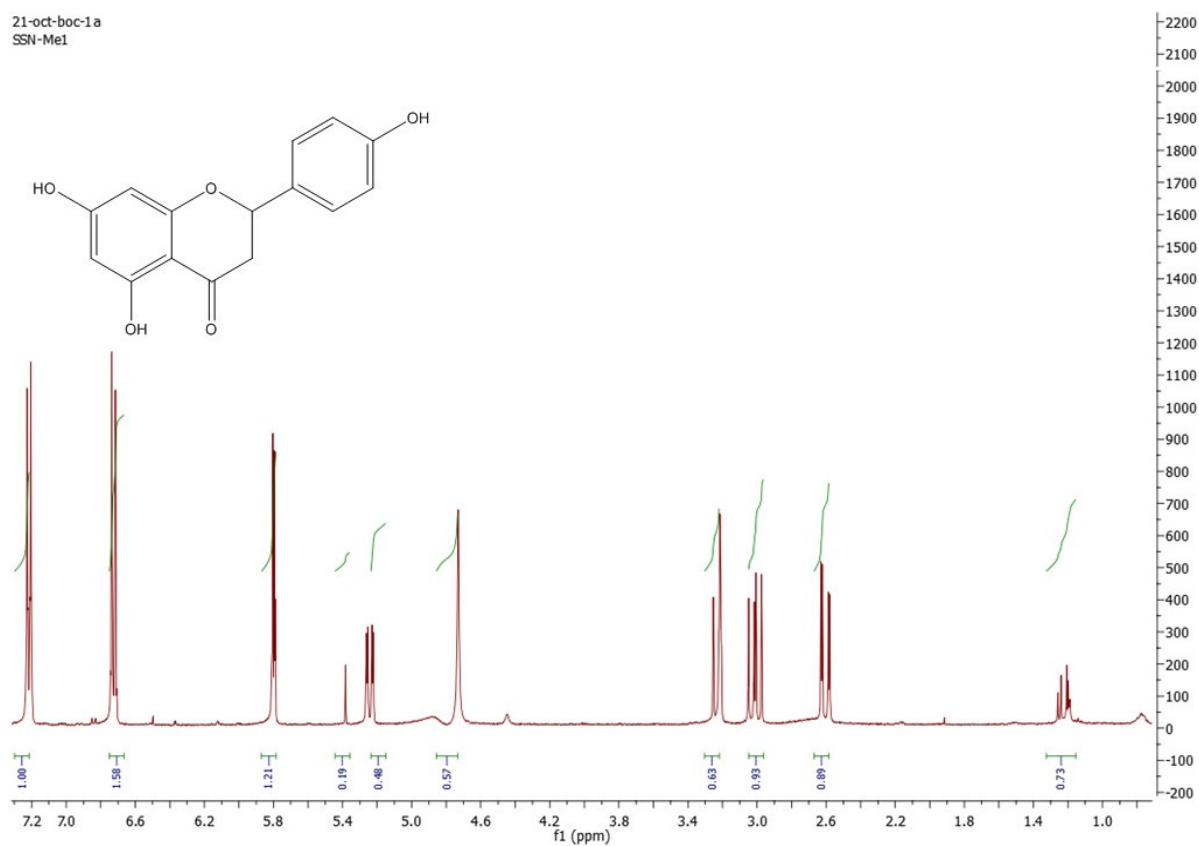

**Figure S1.** NMR spectra of Naringenin. The hydrogen of the hydroxyl of carbons C-5 and C-7 in the naringenin molecule is responsible for displacements at 7.21 and 6.83 ppm, respectively.  $^1\text{H}$ -NMR measurements were performed by Bruker Avance spectrometer at operating frequency of 500 MHz using Dimethyl sulphoxide (DMSO) as solvent.

**Table S1.** Assigned peaks and corresponding functional moieties via FTIR analysis present in hexane extracts of plant *N. Mexicana* Zucc.

| S.No | Absorption frequency(cm <sup>-1</sup> ) | Appearance    | Functional Group   | Compound class                  |
|------|-----------------------------------------|---------------|--------------------|---------------------------------|
| 1    | 3746                                    | medium, sharp | O-H stretching     | alcohol                         |
| 2    | 3671                                    | strong, broad | O-H stretching     | alcohol                         |
| 3    | 3377                                    | strong        | O-H stretching     | Alcohol(inter-molecular bonded) |
| 4    | 2918                                    | medium        | C-H stretching     | alkane                          |
| 6    | 2366                                    | Strong, broad | N=C=O stretching   | isocyanate                      |
| 7    | 2117                                    | weak          | C≡C                | Alkyne (mono-substituted)       |
| 8    | 1703                                    | strong        | C=O stretching     | Conjugated acid(dimer)          |
| 9    | 1617                                    | medium        | C=C stretching     | Conjugated alkene               |
| 10   | 1334                                    | medium        | O-H bending        | alcohol                         |
| 11   | 1505                                    | strong        | N-O stretching     | Nitro compound                  |
| 12   | 1438                                    | medium        | O-H bending        | Carboxylic acid                 |
| 13   | 1379                                    | Strong        | S=O stretching     | Sulfonic acid                   |
| 14   | 1274                                    | strong        | C=O stretching     | alkyl aryl ether                |
| 15   | 1207                                    | strong        | C=O stretching     | ester                           |
| 16   | 1129                                    | strong        | C=O stretching     | aliphatic ester                 |
| 17   | 1037                                    | strong        | S=O stretching     | sulfoxide                       |
| 18   | 1013                                    | Strong, broad | CO-O-CO stretching | anhydride                       |
| 19   | 823                                     | medium        | C=C stretching     | Alkene(tri-substituted)         |

**Table S2.** FT IR analysis, assigned peaks and corresponding functional moieties present in methanol extract of plant *N.mexicana* Zucc.

| S.No | Absorption frequency(cm <sup>-1</sup> ) | Appearance    | Functional Group   | Compound class                  |
|------|-----------------------------------------|---------------|--------------------|---------------------------------|
| 1    | 3746                                    | medium, sharp | O-H stretching     | alcohol                         |
| 2    | 3671                                    | strong, broad | O-H stretching     | alcohol                         |
| 3    | 3377                                    | strong        | O-H stretching     | Alcohol(inter-molecular bonded) |
| 4    | 2918                                    | medium        | C-H stretching     | alkane                          |
| 6    | 2366                                    | Strong, broad | N=C=O stretching   | isocyanate                      |
| 7    | 2117                                    | weak          | C≡C                | Alkyne (mono-substituted)       |
| 8    | 1703                                    | strong        | C=O stretching     | Conjugated acid(dimer)          |
| 9    | 1617                                    | medium        | C=C stretching     | Conjugated alkene               |
| 10   | 1334                                    | medium        | O-H bending        | alcohol                         |
| 11   | 1505                                    | strong        | N-O stretching     | Nitro compound                  |
| 12   | 1438                                    | medium        | O-H bending        | Carboxylic acid                 |
| 13   | 1379                                    | Strong        | S=O stretching     | Sulfonic acid                   |
| 14   | 1274                                    | strong        | C=O stretching     | alkyl aryl ether                |
| 15   | 1207                                    | strong        | C=O stretching     | ester                           |
| 16   | 1129                                    | strong        | C=O stretching     | aliphatic ester                 |
| 17   | 1037                                    | strong        | S=O stretching     | sulfoxide                       |
| 18   | 1013                                    | Strong, broad | CO-O-CO stretching | anhydride                       |
| 19   | 823                                     | medium        | C=C stretching     | Alkene(tri-substituted)         |
